# Supplementary material for: Synthesis of hexagonal-symmetry α-iron oxyhydroxide crystals using reduced graphene oxide as a surfactant and their Li storage properties
Source: Royal Society of Chemistry journal article supplement (doi:10.1039/c1ce05965c), 2011-10-14
Supplement: c1ce05965c.pdf [file c1ce05965c.pdf]

## Electronic supplementary information

### Synthesis of Hexagonal-symmetry $\alpha$ -Iron Oxyhydroxide Crystals Using Reduced Graphene Oxide as Surfactants and Their Li Storage Properties

Cuimiao Zhang<sup>a,b</sup>, Jixin Zhu<sup>a</sup>, Xianhong Rui<sup>a,b</sup>, Jing Chen<sup>a</sup>, Daohao Sim<sup>a</sup>, Wenhui Shi<sup>a</sup>, Huey Hoon Hng<sup>a</sup>, Tuti Mariana Lim<sup>b,c,\*</sup> and Qingyu Yan<sup>a,d,e,\*</sup>

<sup>a</sup> School of Materials Science and Engineering, Nanyang Technological University, 50 Nanyang Avenue, Singapore 639798, Singapore

<sup>b</sup> School of Civil & Environmental Engineering, Nanyang Technological University, 50 Nanyang Avenue, Singapore 639798, Singapore

<sup>c</sup> School of Life Sciences and Chemical Technology, Ngee Ann Polytechnic, 599489, Singapore

<sup>d</sup> Energy Research Institute, Nanyang Technological University, 637459, Singapore

<sup>e</sup> TUM CREATE Centre for Electromobility, Nanyang Technological University, 637459, Singapore

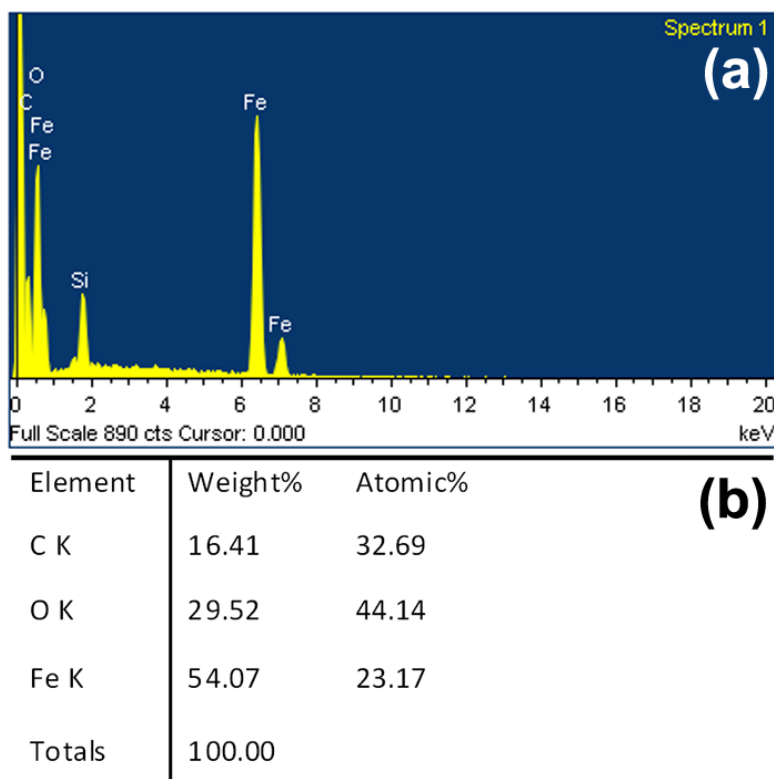

**Fig. S1**

Fig. S1 EDX (a) and elements analysis results (b) of the as-prepared  $\alpha$ -FeOOH/rGO sample at 180 °C for 24 hours with concentration of 0.0143 M Fe<sup>3+</sup>.

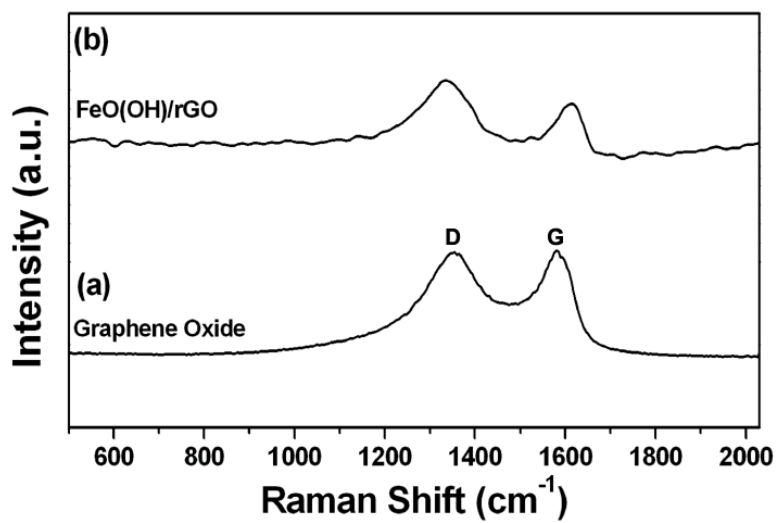

Fig. S2

Fig. S2 Raman spectra of the graphene oxide (a) and as-prepared  $\alpha$ -FeOOH/rGO (b).

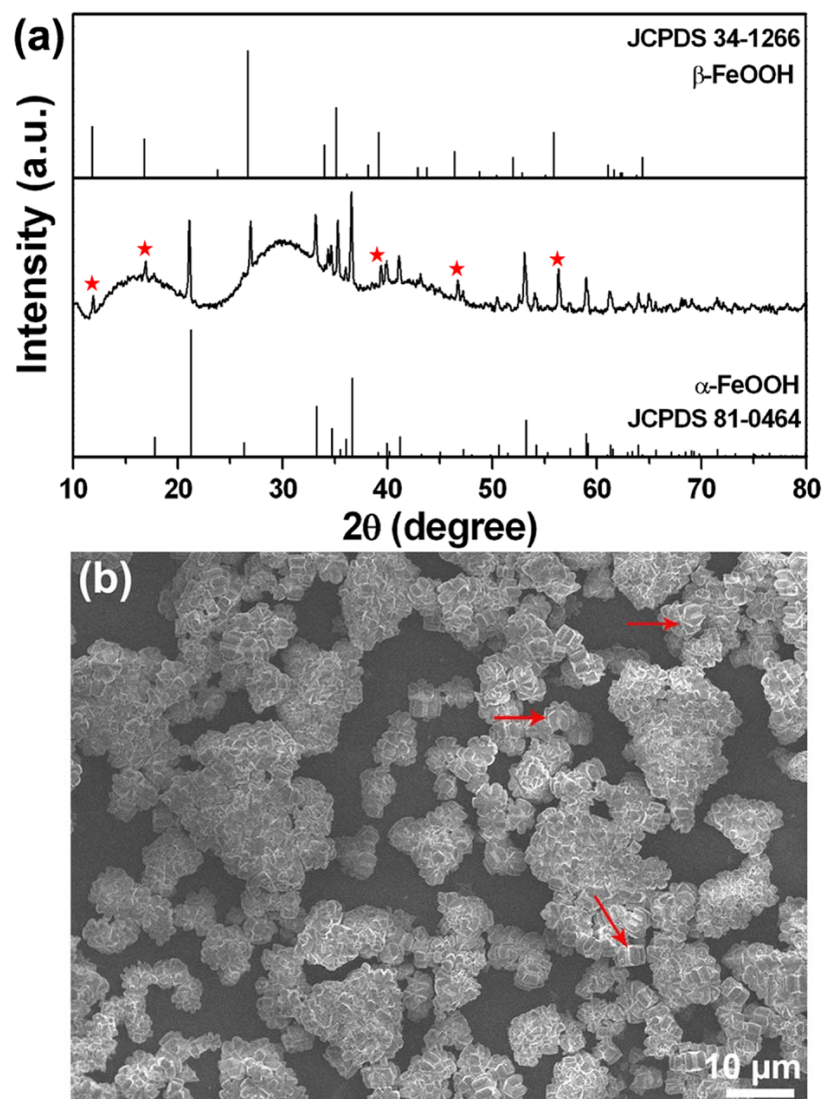

**Fig. S3**

Fig. S3 XRD pattern (a) and SEM image (b) of as-synthesized FeOOH without GO during the synthetic process. The standard data of FeOOH (JCPDS 81-0464 and 34-1266) are also plotted as reference.

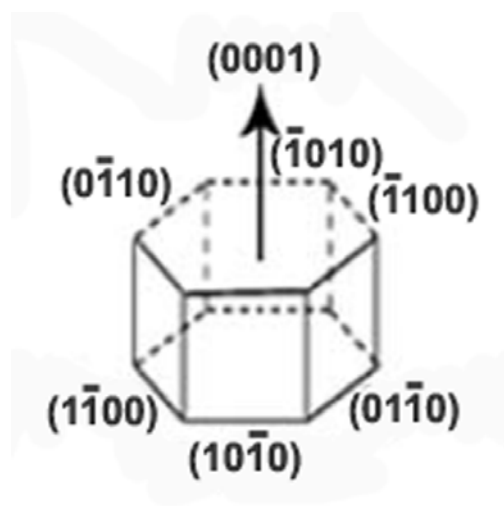

**Fig. S4**

Fig. S4 Schematic diagram of  $\alpha$ -FeOOH hexagonal structures with different crystal planes.

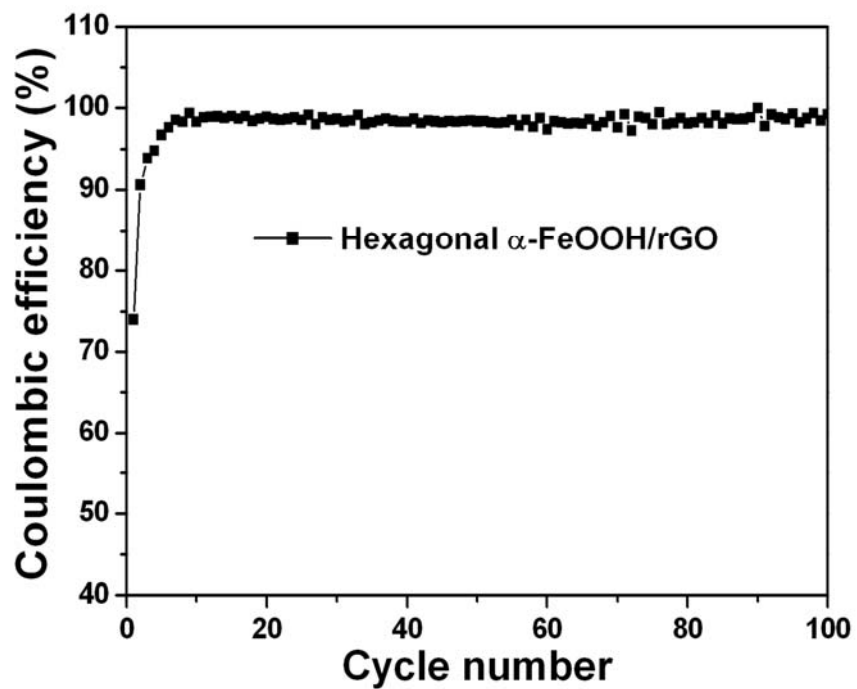

Fig. S5

Fig. S5 The coulombic efficiency of hexagonal-disk  $\alpha$ -FeOOH/rGO electrode at a current density of 100 mA/g with a voltage window of 0.005–3.0 V.

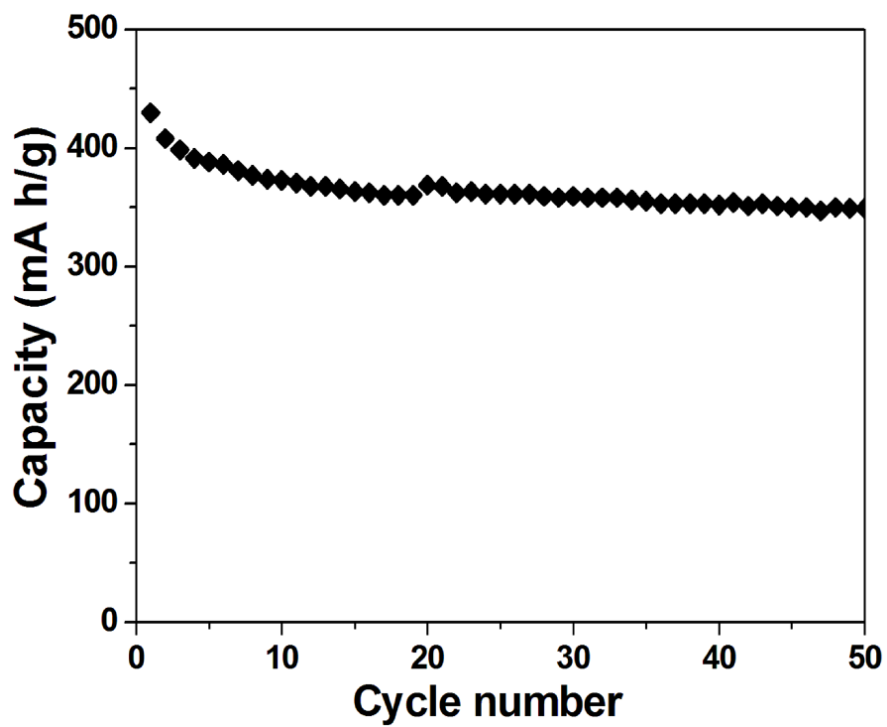

Fig. S6

Fig. S6 Cycling performance of pure FeOOH electrode at a current density of 100 mA/g.

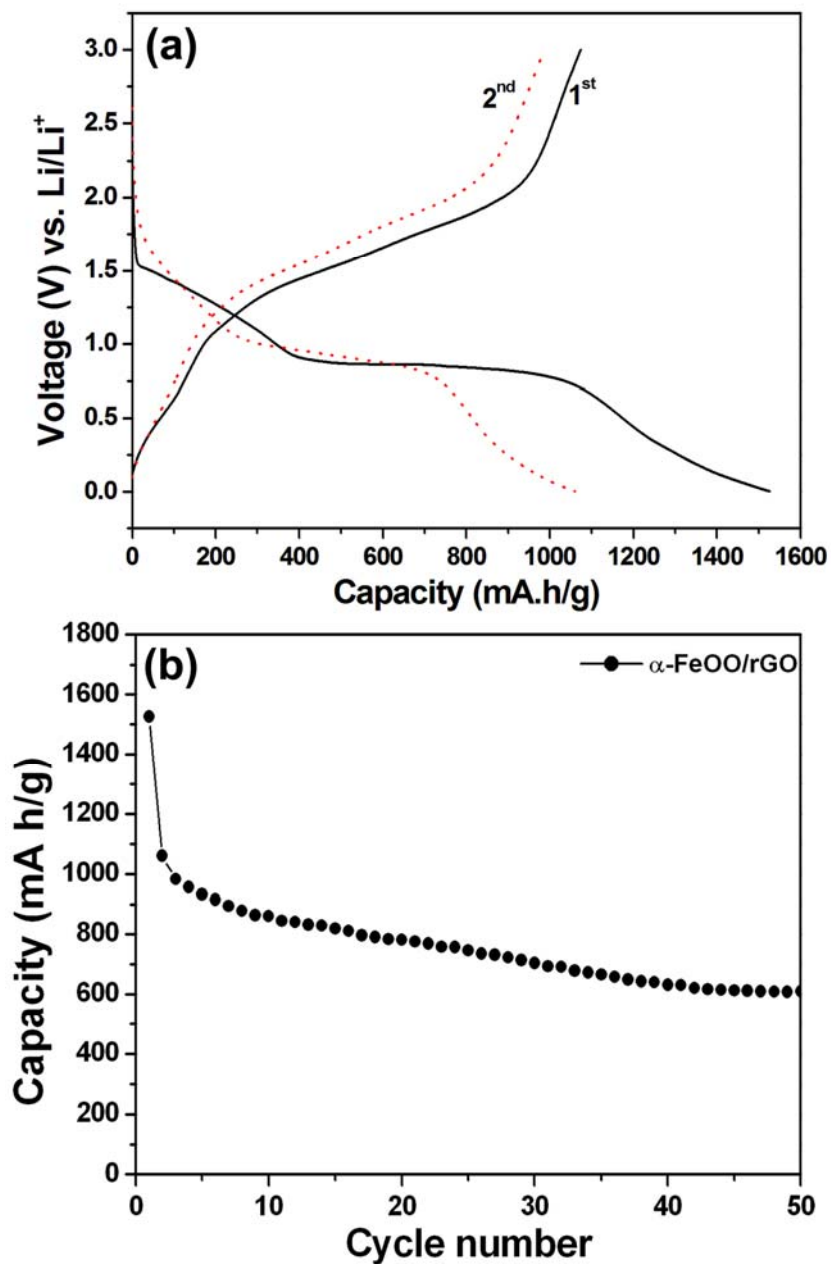

Fig. S7

Fig. S7 (a) Charge-Discharge voltage profiles of hexapod  $\alpha$ -FeOOH/rGO sample for the first and second cycles at a current density of 100 mA/g. (b) Cycling performance of hexapod  $\alpha$ -FeOOH/rGO sample at the current density of 100 mA/g.
